# Supplementary material
Source: publisher figshare collection journal article supplement (https://acs.figshare.com/ndownloader/files/22056780)
Supplement: Supplementary file 1 [file 22056780]

## **Supporting Information**

### **Mussel-Inspired Polydopamine Coating Enhances the Intra-Cutaneous Drug Delivery from Nanostructured Lipid Carriers Dependently on a Follicular Pathway**

Yang Chen<sup>1\*</sup>    Xun Feng<sup>2</sup>    Yan Zhao<sup>1</sup>    Xu Zhao<sup>3</sup>    Xiaoyu Zhang<sup>4</sup>

1. Department of Pharmaceutics, School of Pharmacy, China Medical University, Shenyang, China
2. Department of Sanitary Inspection, School of Public Health, Shenyang Medical College, No.146 Yellow River North Street, Shenyang, China
3. School of Pharmacy, China Medical University, Shenyang, China
4. China Medical University-The Queen's University of Belfast Joint College, China Medical University, Shenyang, China

#### **\*Corresponding Author**

Yang Chen

Department of Pharmaceutics, School of Pharmacy, China Medical University, Shenyang, China

Email: chenyangpharm@163.com

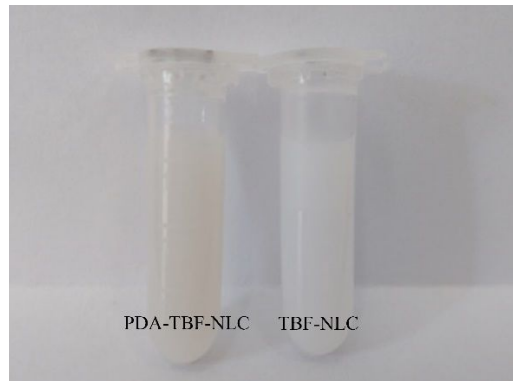

**Figure S1. The photograph of PDA-TBF-NLC and TBF-NLC**

**Table S1. Particle size, polydispersity index (PDI) and entrapment efficiency (EE) of the TBF-NLC and PDA-TBF-NLC after storage at 25°C ± 2°C (*n* = 3)**

| Time (d) | TBF-NLC      |           |            | PDA-TBF-NLC |           |            |
|----------|--------------|-----------|------------|-------------|-----------|------------|
|          | Size (nm)    | PDI       | EE%        | Size (nm)   | PDI       | EE%        |
| 1        | 239.57±4.69  | 0.16±0.05 | 62.65±3.37 | 264.57±9.85 | 0.30±0.03 | 59.51±4.32 |
| 7        | 276.10±10.83 | 0.25±0.01 | 71.56±2.97 | 298.63±7.30 | 0.40±0.01 | 69.75±3.25 |

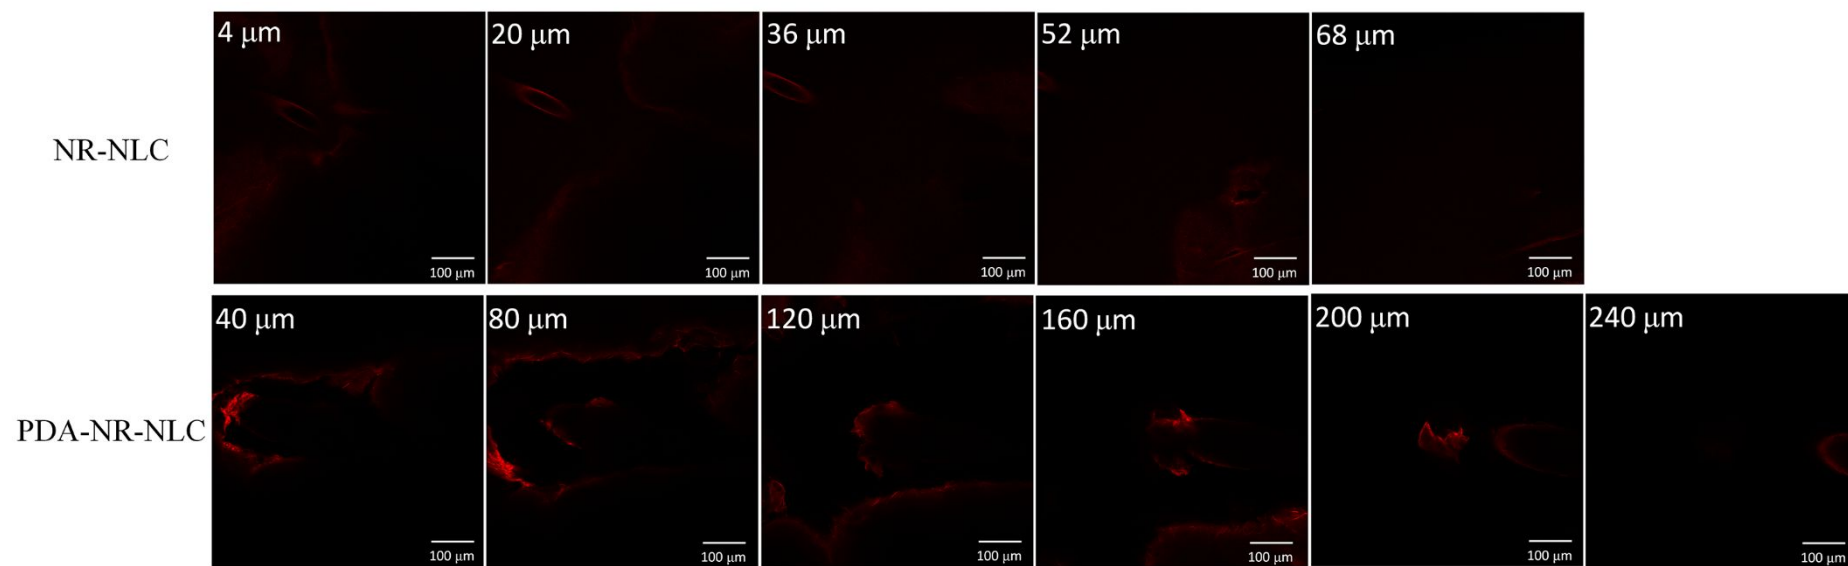

**Figure S2.** The two-dimensional Z-stack images of confocal microscopy observation of the skin treated with NR-NLC and PDA-NR-NLC.
